# Supplementary material for: Chemical crosslinking enhances RNA immunoprecipitation for efficient identification of binding sites of proteins that photo-crosslink poorly with RNA
Source: PubMed Central journal article supplement — RNA. 2020 Sep;26(9):1216–33. doi: 10.1261/rna.074856.120 (PMC7430673; doi:10.1261/rna.074856.120), 2020-09
Supplement: supp_074856.120_Supplemental_Fig_S1.pdf [file supp_074856.120_Supplemental_Fig_S1.pdf]

## Supplemental Fig. 1

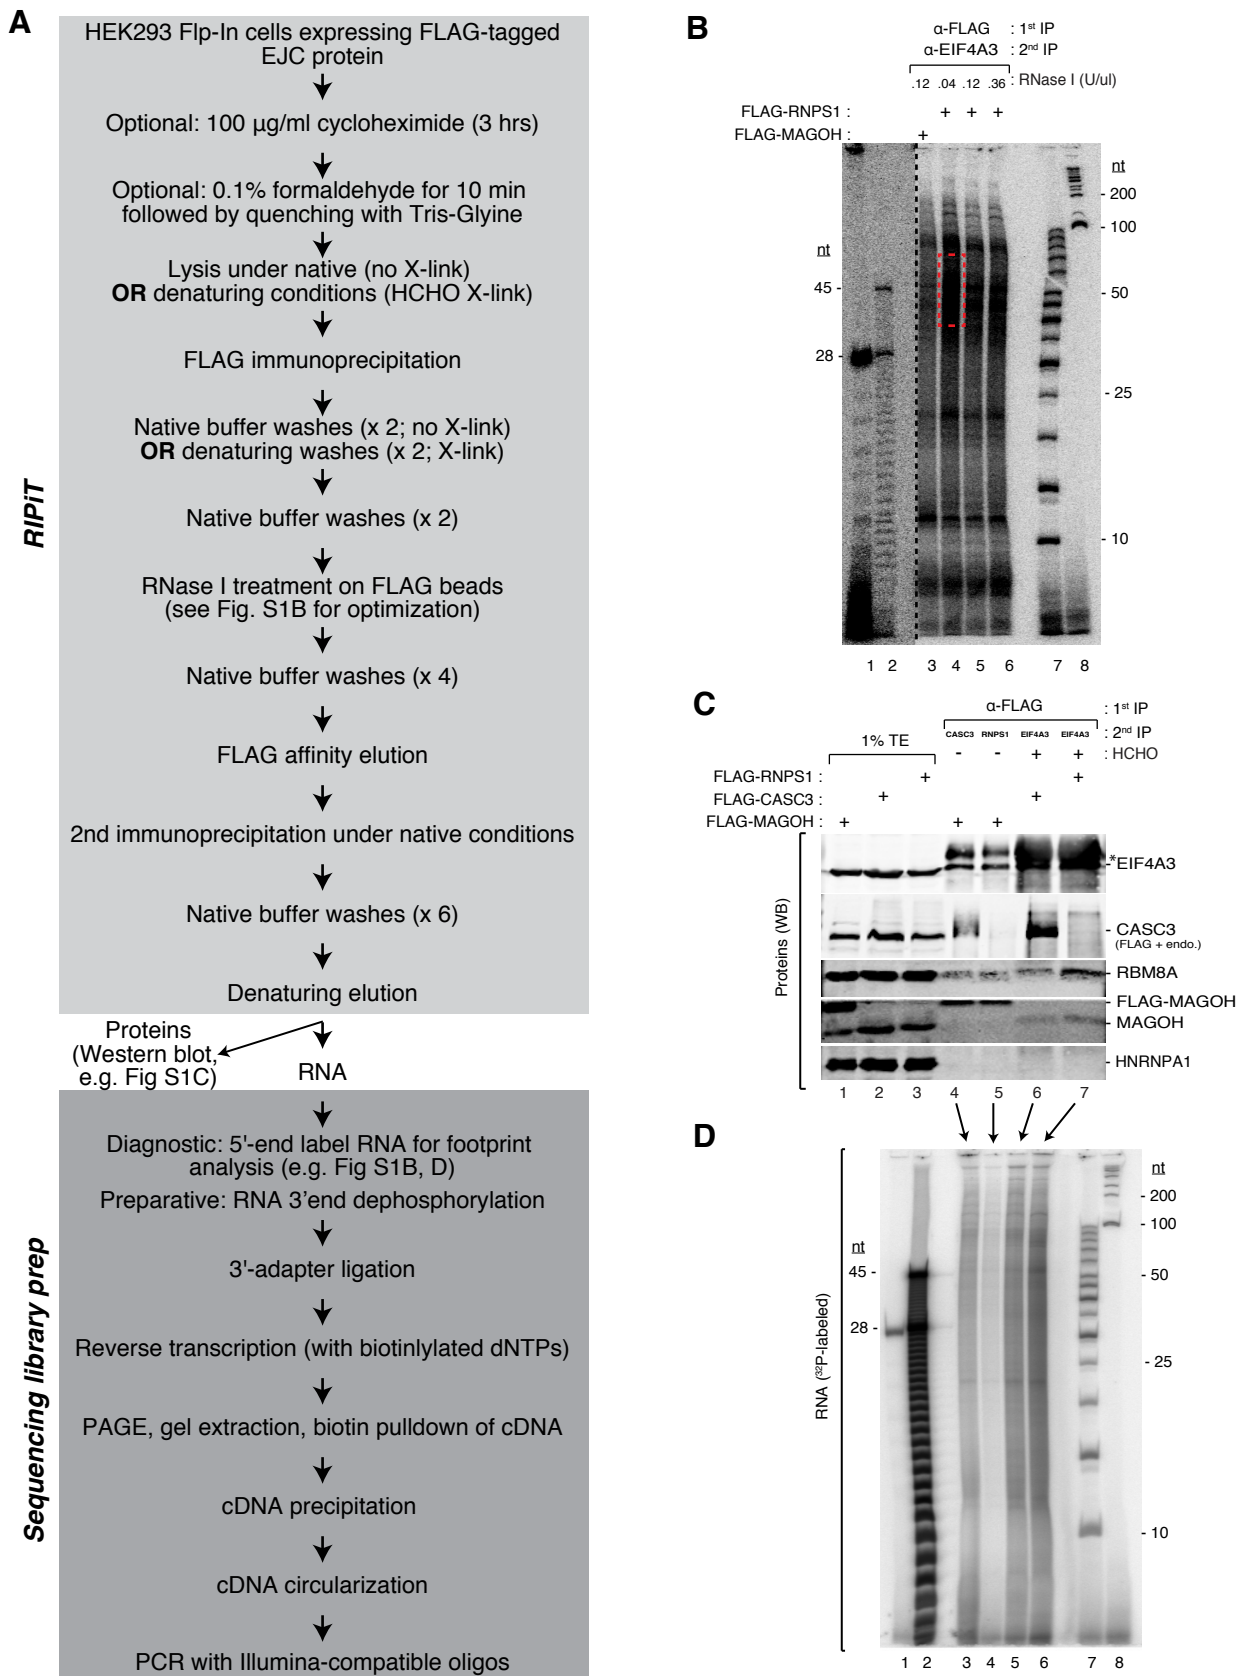

### Supplemental Fig. 1. Overview of RIPiT-Seq and xRIPiT optimal RNase I conditions.

**A.** Major steps in RIPiT and subsequent high-throughput sequencing library preparation.

**B.** Autoradiogram showing <sup>32</sup>P-labeled RNAs from RNase I titration for FLAG-RNPS1:EIF4A3 xRIPiT. Top: FLAG cell lines, RNase I concentrations, and epitope/proteins subjected to IP. Sides: nucleotide (nt) size markers. Red rectangle: region with optimal RNA footprint lengths.

**C.** Western blots showing proteins (on the right) in total extract (TE, lanes 1-3) or RIPiT elutions (lanes 4-7). Top: FLAG cell lines and formaldehyde (HCHO) crosslinking conditions.

**D.** Autoradiogram as in B showing RNA footprints from RIPiTs shown in C.
