# Supplementary material for: Chemical crosslinking enhances RNA immunoprecipitation for efficient identification of binding sites of proteins that photo-crosslink poorly with RNA
Source: PubMed Central journal article supplement — RNA. 2020 Sep;26(9):1216–33. doi: 10.1261/rna.074856.120 (PMC7430673; doi:10.1261/rna.074856.120), 2020-09
Supplement: supp_074856.120_Supplemental_Fig_S2.pdf [file supp_074856.120_Supplemental_Fig_S2.pdf]

## Supplemental Fig. 2

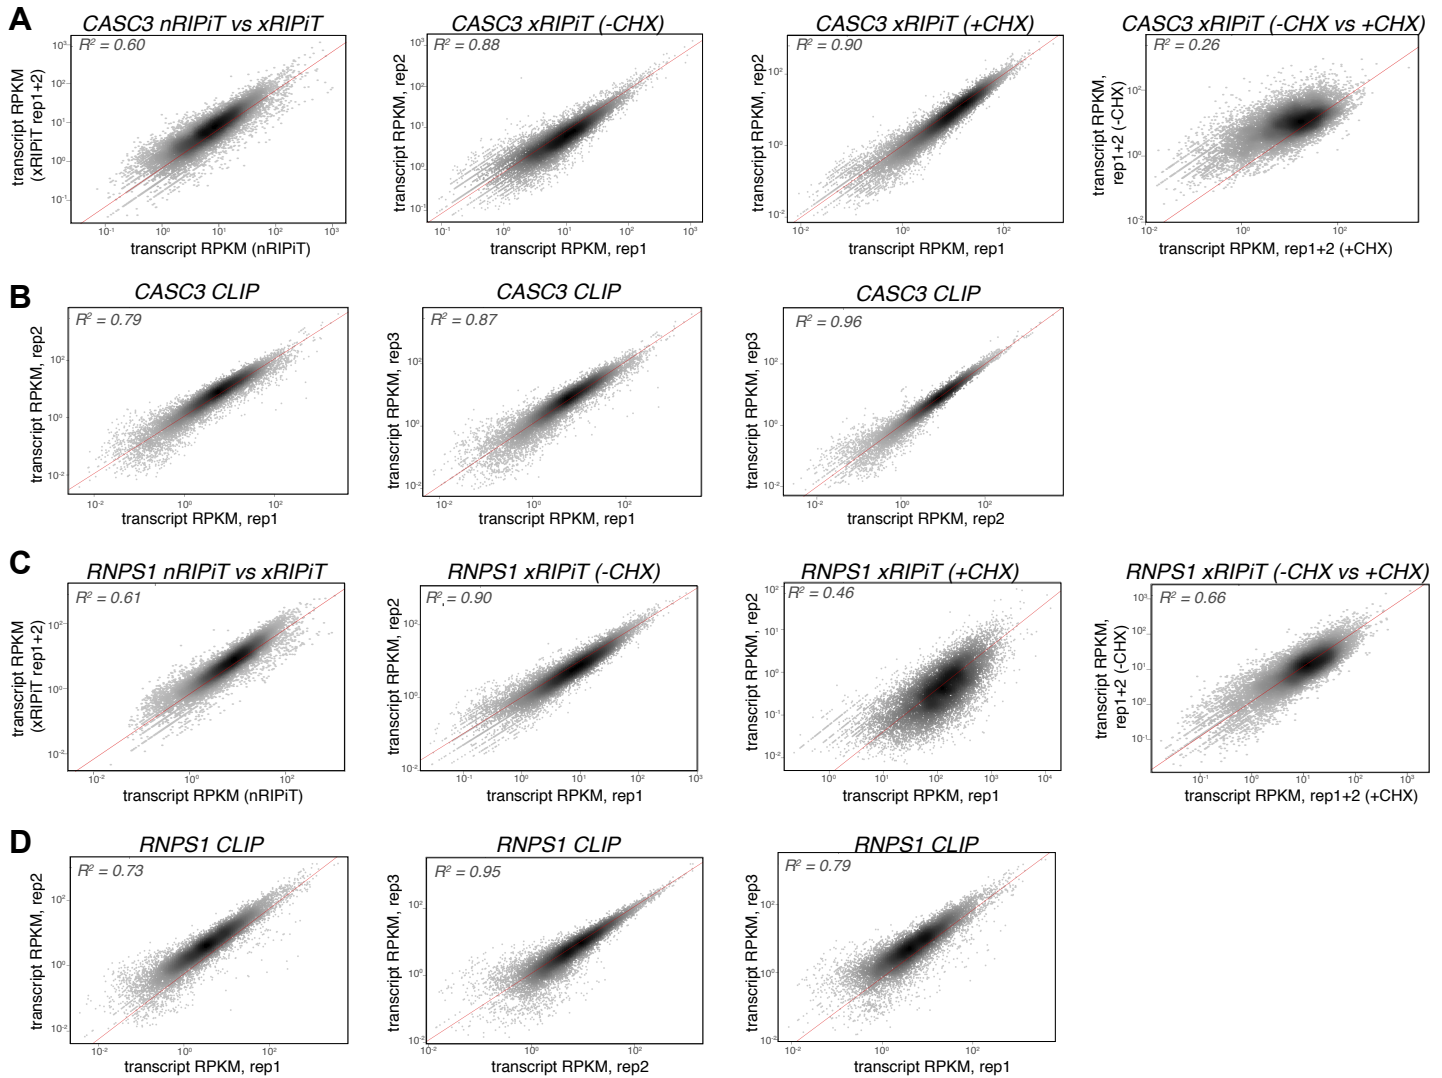

### Supplemental Fig. 2. Replicate comparisons.

- A.** Scatter-plots showing comparison between CASC3 nRIPiT and xRIPiT replicates (leftmost plot), and between replicates of CASC3 xRIPiTs (other three plots). The specific RIPiT being compared is indicated on top of each plot. For comparisons between xRIPiTs from -CHX and +CHX conditions, individual replicates for each RIPiT were combined. Correlation coefficients are in the top left corner.
- B.** CASC3 CLIP replicate comparisons. Correlation coefficients are in the top left corner.
- C.** Scatter-plots as in A showing comparison between RNPS1 nRIPiT and xRIPiT, or between replicates of RNPS1 xRIPiTs.
- D.** RNPS1 CLIP replicate comparisons as in B.
