# Supplementary material for: Chemical crosslinking enhances RNA immunoprecipitation for efficient identification of binding sites of proteins that photo-crosslink poorly with RNA
Source: PubMed Central journal article supplement — RNA. 2020 Sep;26(9):1216–33. doi: 10.1261/rna.074856.120 (PMC7430673; doi:10.1261/rna.074856.120), 2020-09
Supplement: supp_074856.120_Supplemental_Fig_S3.pdf [file supp_074856.120_Supplemental_Fig_S3.pdf]

### Supplemental Fig. 3

A

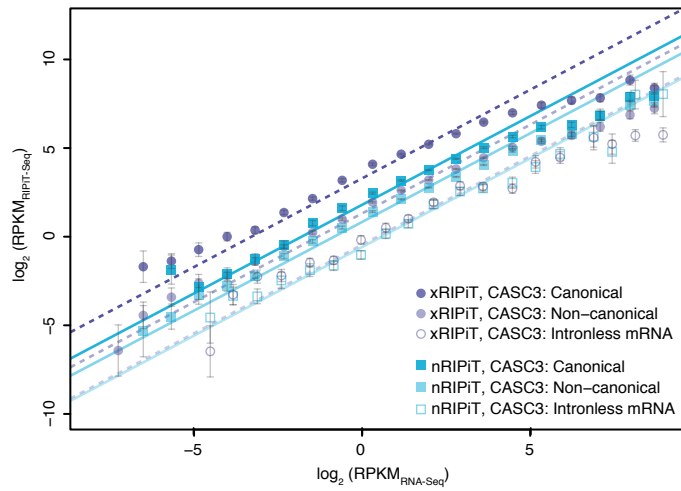

### Supplemental Fig. 3. Linear fits and their intercepts.

Linear fit lines for each of the six classes where CASC3 binding is estimated (Fig. 3). Fit lines for xRIPiT-Seq (dotted lines) and nRIPiT-Seq (solid lines) are color-coded to match the corresponding class.
