# Supplementary material for: Chemical crosslinking enhances RNA immunoprecipitation for efficient identification of binding sites of proteins that photo-crosslink poorly with RNA
Source: PubMed Central journal article supplement — RNA. 2020 Sep;26(9):1216–33. doi: 10.1261/rna.074856.120 (PMC7430673; doi:10.1261/rna.074856.120), 2020-09
Supplement: supp_074856.120_Supplemental_Fig_S4.pdf [file supp_074856.120_Supplemental_Fig_S4.pdf]

## Supplemental Fig. 4

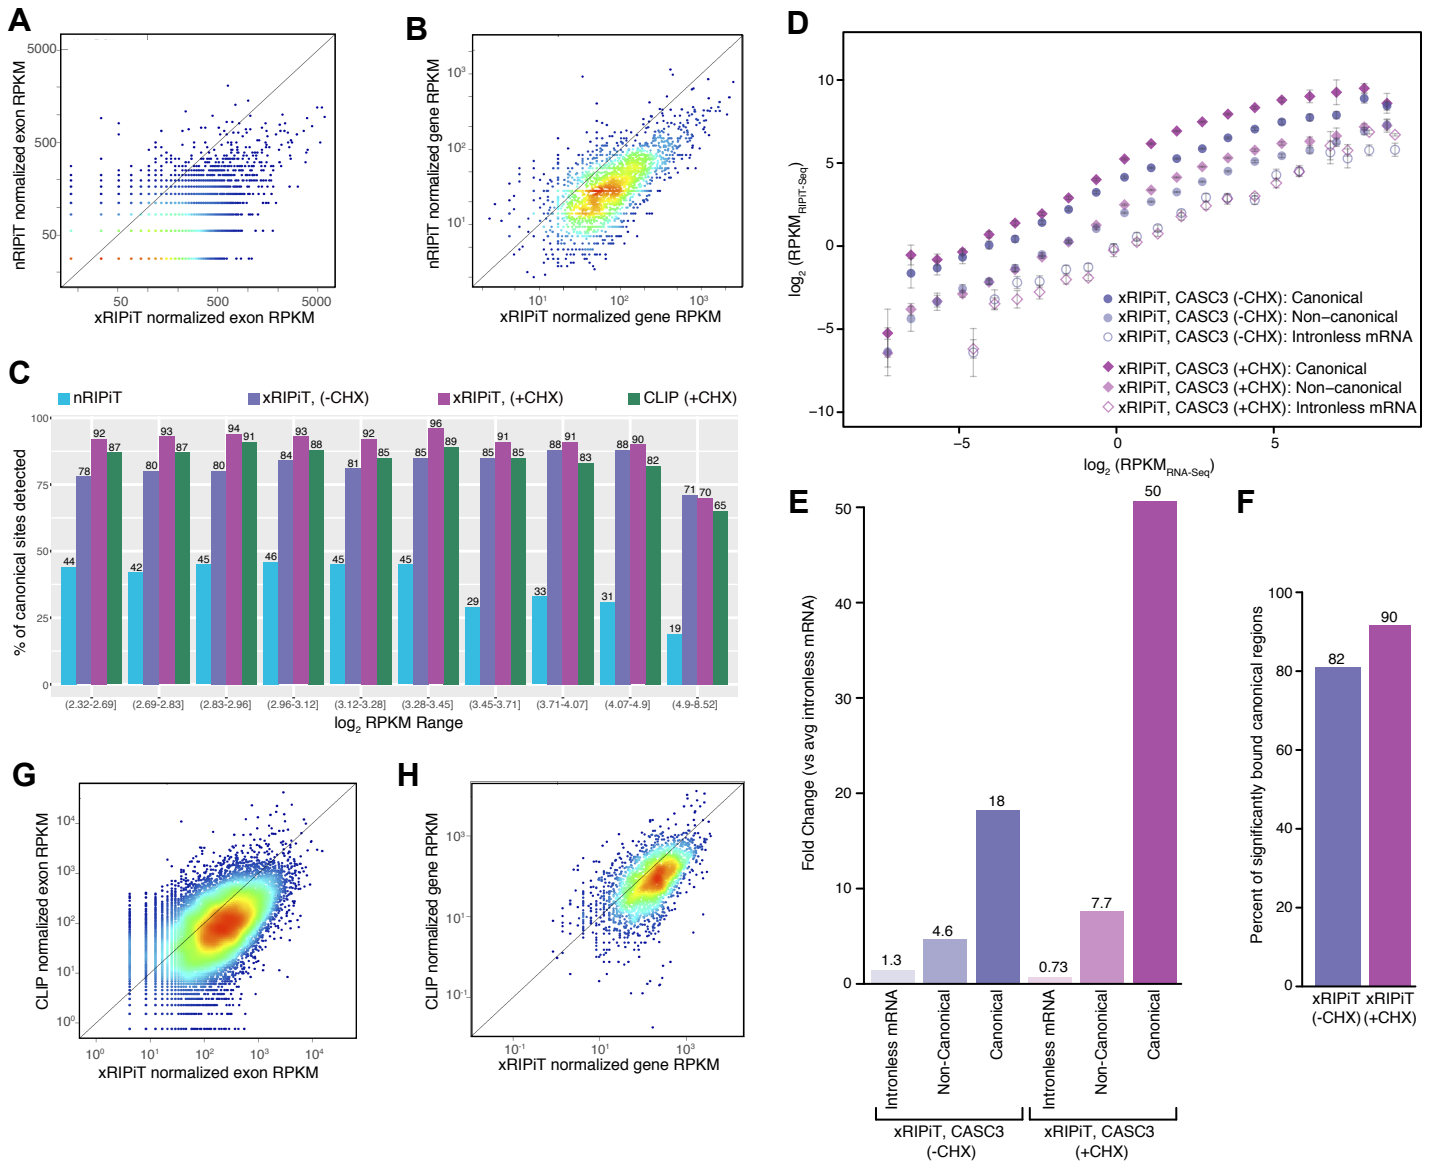

### Supplemental Fig. 4. Quantification of CACS3 occupancy by nRIPiT, xRIPiT and CLIP.

**A.** Scatter-plot of CACS3 nRIPiT versus xRIPiT read densities (RPKM) at individual canonical sites normalized to intronless genes. Heatmap colors indicate plot density (red = most dense, blue = least dense). The diagonal represents canonical sites where nRIPiT and xRIPiT yield equal RPKM counts.

**B.** Scatter-plot as in A comparing gene level normalized RPKM (sum of RPKM for all canonical sites) between CACS3 nRIPiT and xRIPiT.

**C.** Bar-plots showing percent of canonical regions where CACS3 RIPiT or CLIP read counts are  $\geq 2$ -fold over counts in intronless genes in the same expression range bin (921-922 canonical sites/bin).

**D.** Comparison of gene-level CACS3 read density ( $\text{RPKM}_{\text{RIPiT-Seq}}$ ) in cycloheximide (CHX) treated xRIPiT (+CHX, diamonds) and untreated xRIPiT (circles) for canonical (darker-shaded shapes) and non-canonical regions (lighter-shaded shapes), and for intronless genes (empty shapes).

**E.** Comparison of the linear fit coefficients (or intercepts, in log space) of the six classes in (D). Classes are labeled on the bottom.

**F.** Percent of all canonical EJC regions where read depth is  $\geq 2$ -fold as compared to intronless gene read counts in the indicated datasets.

**G.** Scatter-plot as in A comparing normalized RPKM at each canonical site detected in CACS3 xRIPiT and CLIP.

**H.** Scatter-plot as in B comparing gene level normalized RPKM between CACS3 xRIPiT and CLIP.
