# Supplementary material for: Chemical crosslinking enhances RNA immunoprecipitation for efficient identification of binding sites of proteins that photo-crosslink poorly with RNA
Source: PubMed Central journal article supplement — RNA. 2020 Sep;26(9):1216–33. doi: 10.1261/rna.074856.120 (PMC7430673; doi:10.1261/rna.074856.120), 2020-09
Supplement: supp_074856.120_Supplemental_Fig_S5.pdf [file supp_074856.120_Supplemental_Fig_S5.pdf]

## Supplemental Fig. 5

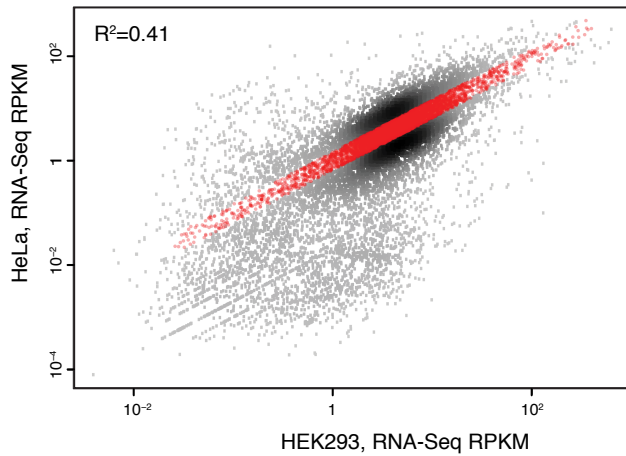

### Supplemental Fig. 5. Gene expression comparison between HEK293 and HeLa cells.

A scatter plot comparing RPKM values in HEK293 cells (x-axis) and HeLa cells (y-axis) for APPRIS principal 1 isoforms representing each GRCh38 human gene. The points representing genes that fall within 1.5-fold change in the two datasets are in red. These were used in the analyses comparing CLIP-Seq to xRIPiT-Seq in Figs. 4 and 5 and Supplemental Figs. S4 and S6.
